# Supplementary material for: Improving Luttinger-liquid plasmons in carbon nanotubes by chemical doping
Source: Royal Society of Chemistry journal article supplement (doi:10.1039/c8nr00310f), 2018-01-01
Supplement: c8nr00310f1.pdf [file c8nr00310f1.pdf]

### Supporting information

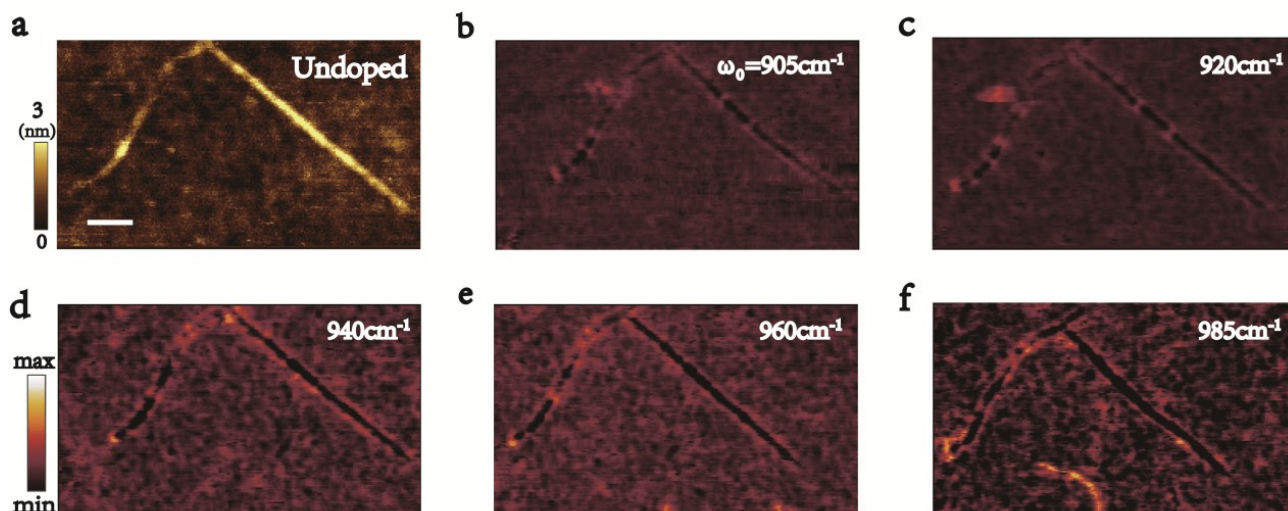

Fig. S1 Near-field optical images (b-f) and AFM topography (a) of the same undoped SWCNTs. (b - f) Infrared s-SNOM images with different excitation wave numbers from 905 to 985  $\text{cm}^{-1}$  for the same undoped nanotubes in figure (a). When changing the laser excitation wave number, there is no much change in optical amplitude intensity, all weaker than the substrate, and no plasmonic oscillation appears. Scale bars: 200 nm.

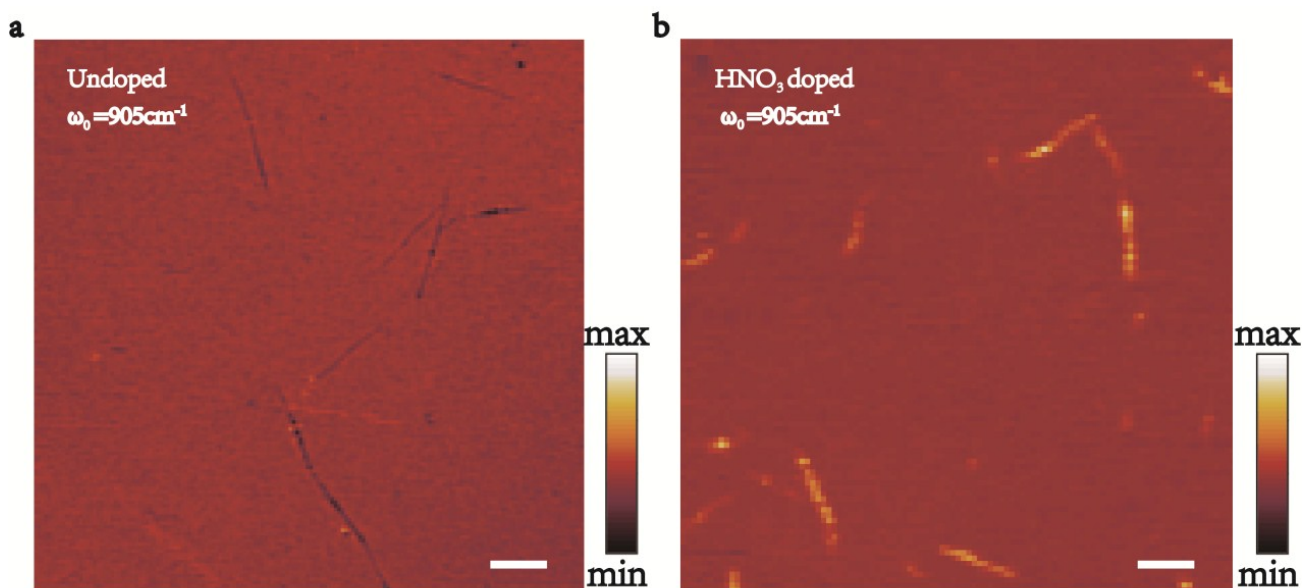

Fig. S2 Near-field optical images of pre- and post- $\text{HNO}_3$ -doped s-SWCNTs. (a) Near-field optical image of undoped s-SWCNTs. The optical amplitudes of all s-SWCNTs are much weaker than that of the  $\text{SiO}_2$  substrate. (b) Near-field optical image of the  $\text{HNO}_3$ -doped s-SWCNTs. The optical amplitude of all the nanotubes is much stronger than the  $\text{SiO}_2$  substrate. Scale bars: 200 nm.
